# Supplementary material for: Two acentric (6, 3) topological 2-D frameworks with imidazole-containing tripodal ligand and their ferroelectric properties
Source: Royal Society of Chemistry journal article supplement (doi:10.1039/c3dt50432h), 2013-01-01
Supplement: c3dt50432h.pdf [file c3dt50432h.pdf]

Table SI Intramolecular and intermolecular hydrogen bonds lengths (Å) and Bond  
Angles (°) for **1** and **2**

| D–H···A          | d(H..A) (Å) | d(D..A) (Å) | ∠DHA(°) |
|------------------|-------------|-------------|---------|
| For <b>1</b>     |             |             |         |
| O4W H4WB ··· O1  | 2.00(1)     | 2.723(7)    | 151(1)  |
| O2W H2WA ··· O1  | 2.16(8)     | 2.784(7)    | 158(9)  |
| O2W H2WB ··· O3  | 1.77(5)     | 2.688(7)    | 172(5)  |
| O4W H4WA ··· O3  | 1.93(7)     | 2.722(8)    | 154(7)  |
| O3W H3WA ··· O4  | 1.98(7)     | 2.739(7)    | 154(7)  |
| O1W H1WA ··· O4  | 1.98(7)     | 2.715(9)    | 138(5)  |
| O1W H1WB ··· O2W | 2.11(1)     | 2.830(7)    | 152(2)  |
| For <b>2</b>     |             |             |         |
| O4W H4WA ··· O1  | 1.925(3)    | 2.756(6)    | 165(4)  |
| O2W H2WA ··· O1  | 1.949(9)    | 2.784(5)    | 167(3)  |
| O4W H4WB ··· O2  | 1.95(3)     | 2.738(6)    | 154(6)  |
| O2W H2WB ··· O2  | 1.89(2)     | 2.687(5)    | 156(5)  |
| O3W H3WB ··· O3  | 1.909(4)    | 2.734(5)    | 163(4)  |
| O1W H1WA ··· O3  | 1.901(5)    | 2.734(5)    | 166(6)  |
| O3W H3WA ··· O2W | 2.018(7)    | 2.827(5)    | 159(4)  |

Copies of crystal data information may be obtained free of charge from: The Director, CCDC, 12 Union Road, Cambridge, CB2 1EZ, UK. Fax (int.code) -44(1223)336-033 or E-mail: deposit@ccdc.cam.ac.uk or <http://www.ccdc.cam.ac.uk>.  
CCDC NO. 923879 for **1** and 923880 for **2**.

**Measurement of electric hysteresis loop:** The ferroelectric properties of solid state samples are measured from a powdered sample in form of a pellet using a standard RT 6000 ferroelectric tester (Radiant Technologies, Albuquerque, USA) at room temperature, while sample was immersed in insulating oil, the electric hysteresis loop was observed by Virtual Ground Mode (The measurement is ac, the frequency is 5–10 Hz).
